# Supplementary material for: Dose-dependent alcohol-induced alterations in chromatin structure persist beyond the window of exposure and correlate with fetal alcohol syndrome birth defects
Source: PubMed Central journal article supplement (PMC4587584; doi:10.1186/s13072-015-0031-7), 2015-09-28

## **Additional Figure 1**

**Alcohol-induced epigenetic alterations in H3K4 me3, H3K9 ac, H3K9 me2, and H3K27 me3 in primary fetal cerebral cortical neuroepithelial stem cells.** Stem cells were cultured in the presence of 160 mg/dL or 240 mg/dL EtOH for 3 days, followed by a 4 day recovery in medium lacking EtOH. Samples were collected at days 3 and 7, and examined for changes in the indicated post-translational histone modifications using chromatin immunoprecipitation followed by quantitative PCR (ChIP-qPCR). Primers were designed to fall within 250 base pairs of the transcriptional start site. Results are graphed relative to the control. Within the 3 separate biological replicates (N=3), 3 ChIPs were performed, and 2 qPCR replicates performed on each independent ChIP. Statistical measures were conducted using the Wilcoxon Signed Rank nonparametric test. \*p<0.05; \*\*p<0.01; \*\*\*p<0.001; \*\*\*\*p<0.0001.

**D3 Ascl1 H3K4**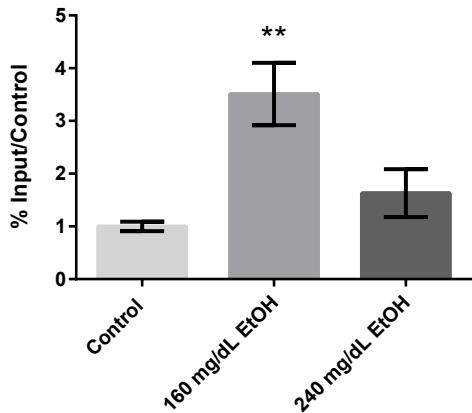**D7 Ascl1 H3K4**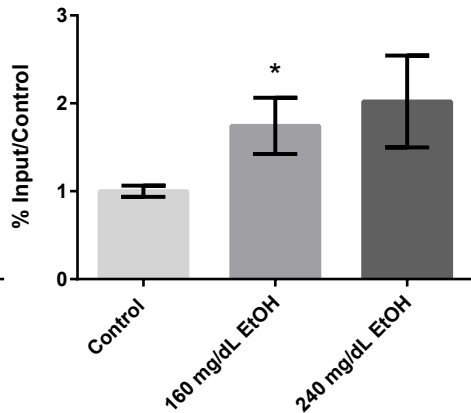**D3 Dlx3 H3K4**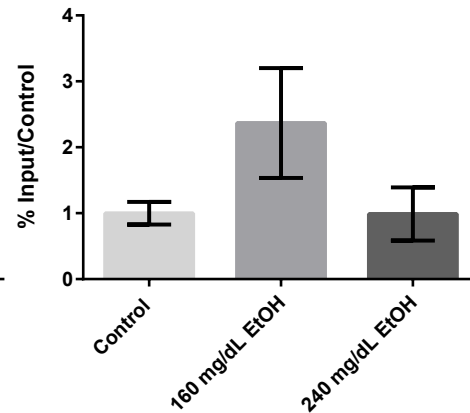**D7 Dlx3 H3K4**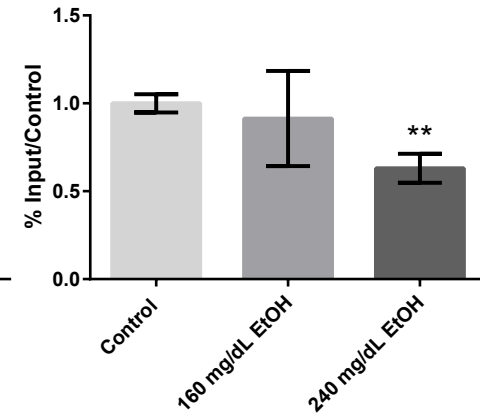**D3 Ascl1 H3K27**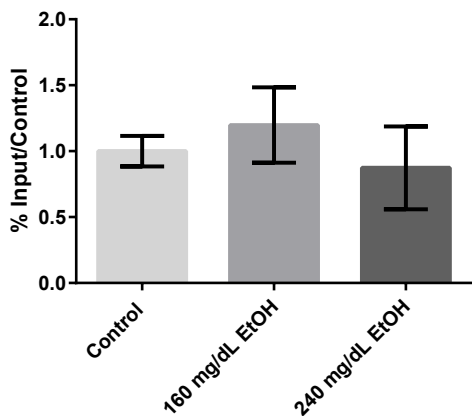**D7 Ascl1 H3K27**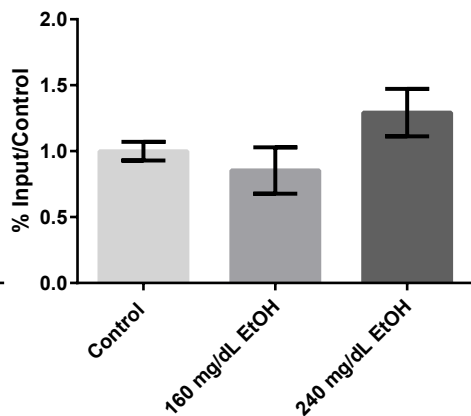**D3 Dlx3 H3K27**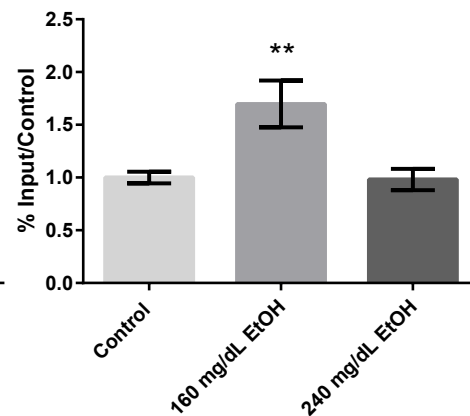**D7 Dlx3 H3K27**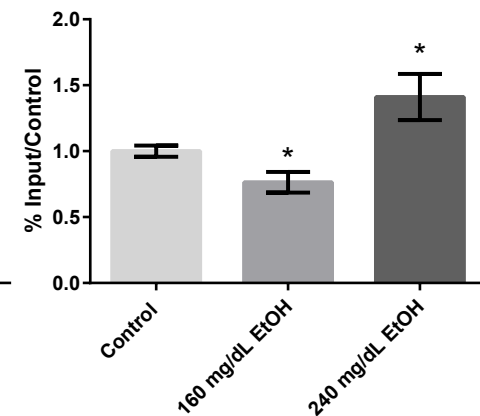

**D3 Nanog H3K4**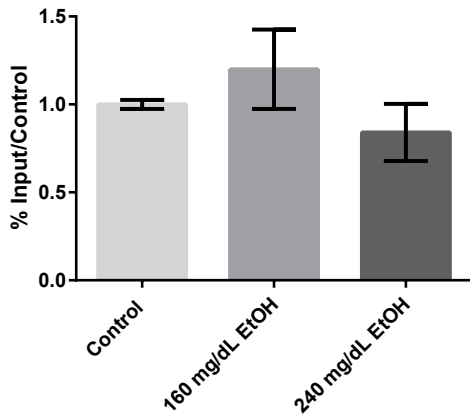**D7 Nanog H3K4**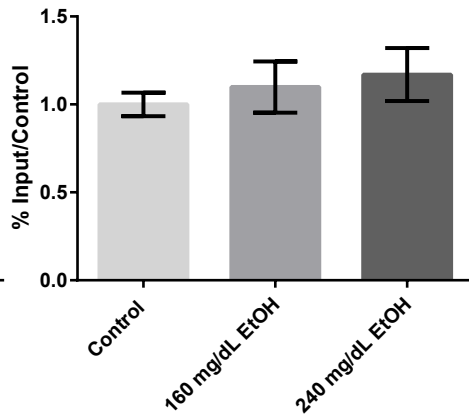**D3 Smarca2 H3K4**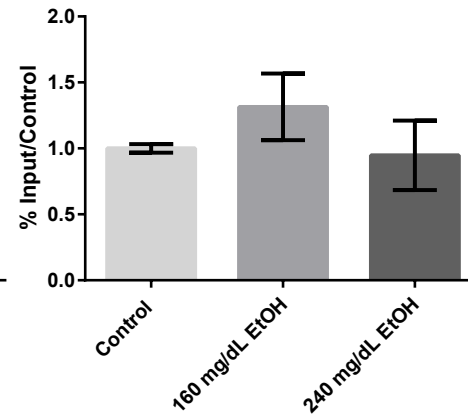**D7 Smarca2 H3K4**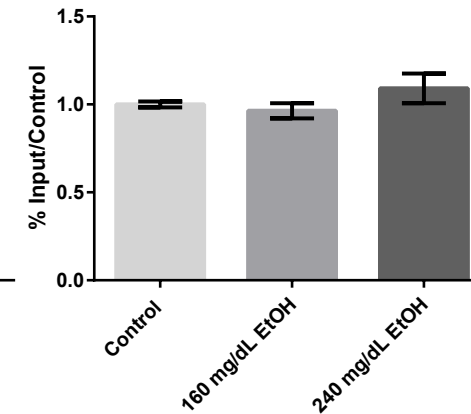**D3 Nanog H3K27**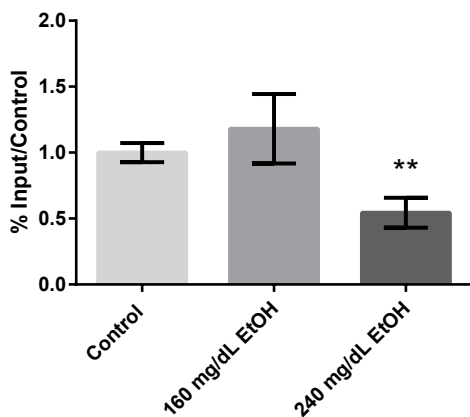**D7 Nanog H3K27**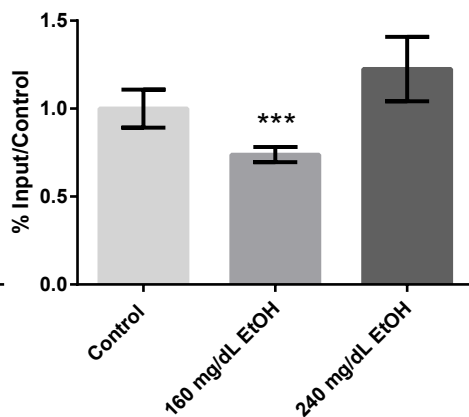**D3 Smarca2 H3K27**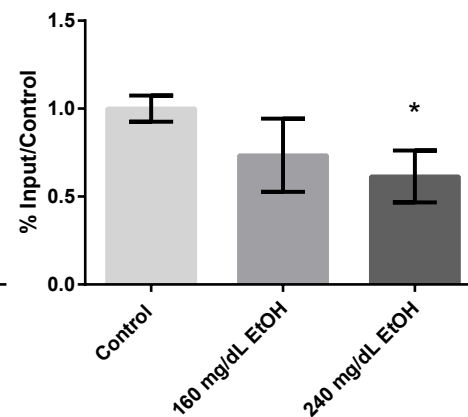**D7 Smarca2 H3K27**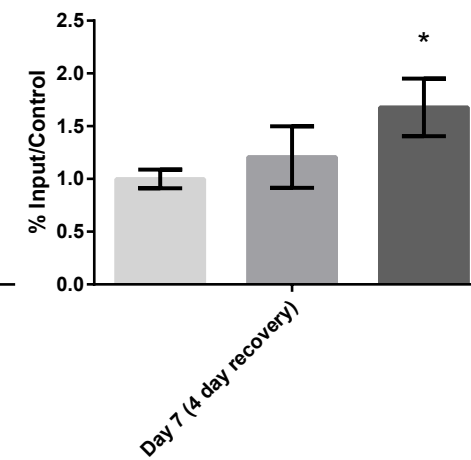

**D3 Dlx5 H3K4**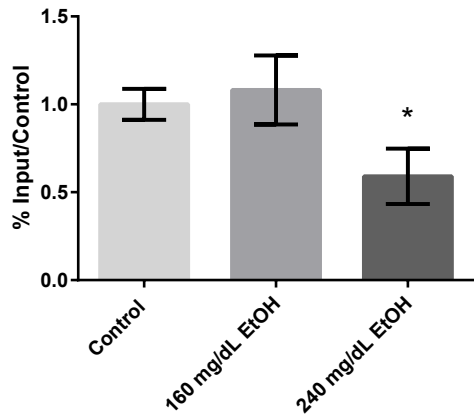**D7 Dlx5 H3K4**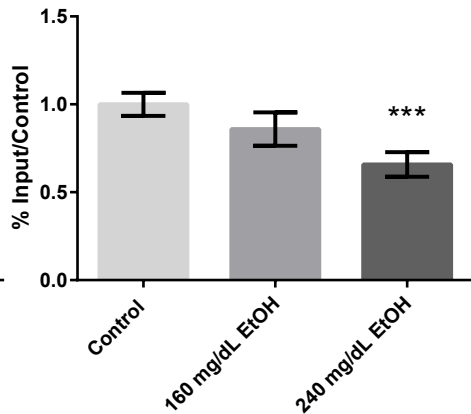**D3 Sox17 H3K4**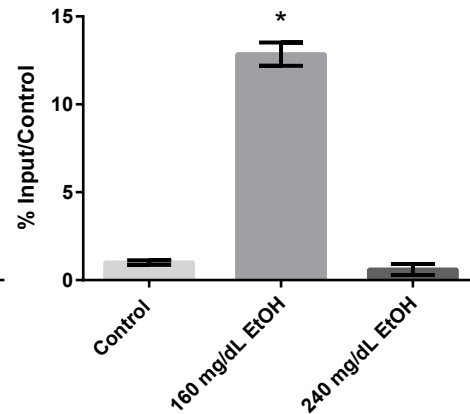**D7 Sox17 H3K4**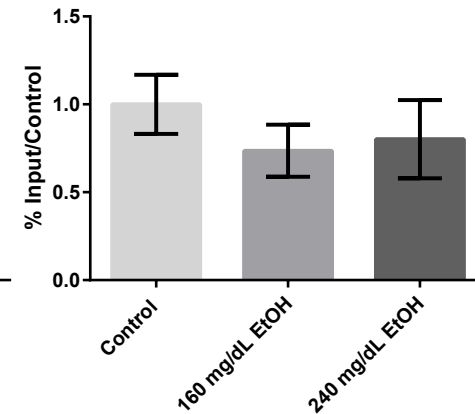**D3 Dlx5 H3K27**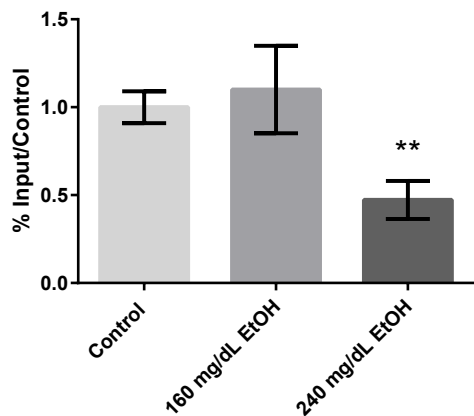**D7 Dlx5 H3K27**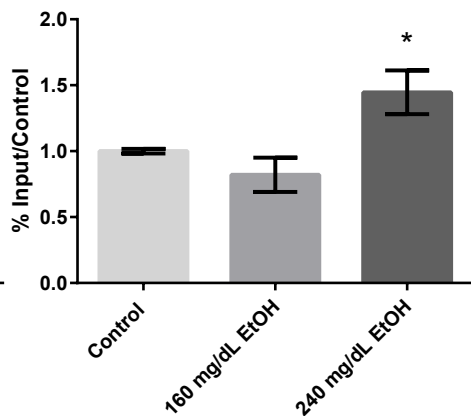**D3 Sox17 H3K27**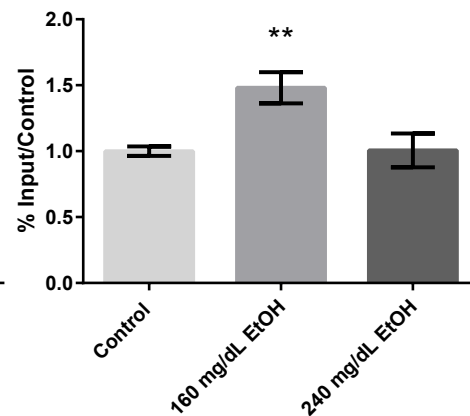**D7 Sox17 H3K27**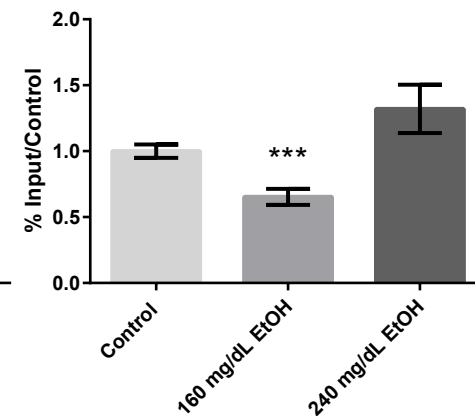

**D3 Msx1 H3K4**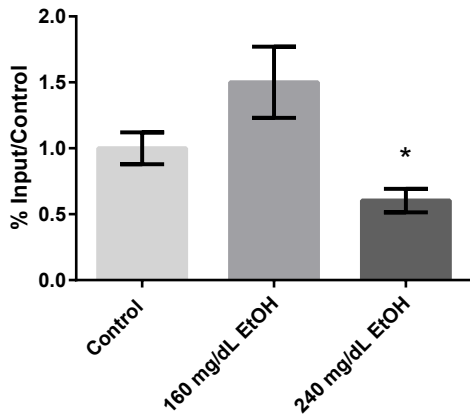**D7 Msx1 H3K4**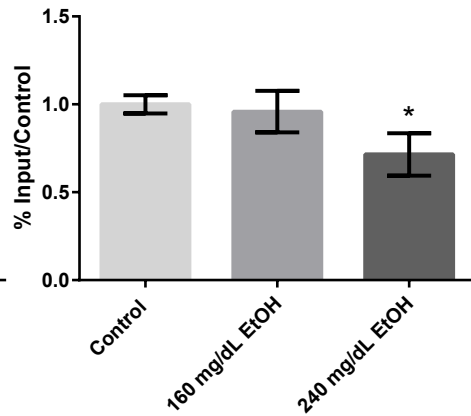**D3 Msx2 H3K4**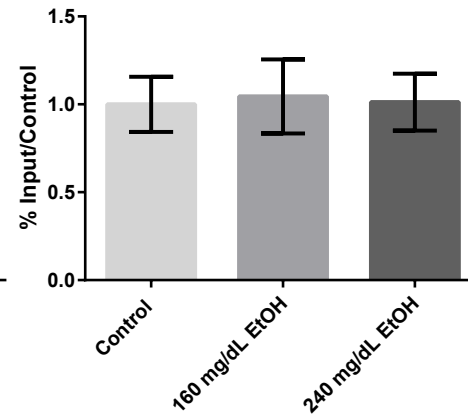**D7 Msx2 H3K4**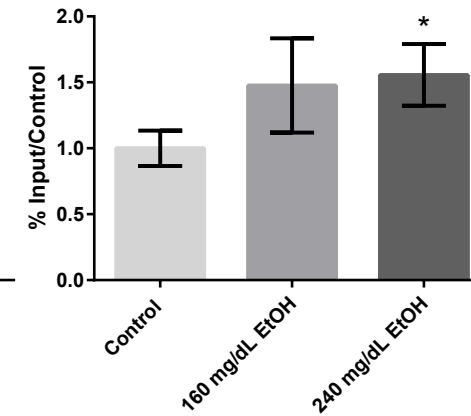**D3 Msx1 H3K27**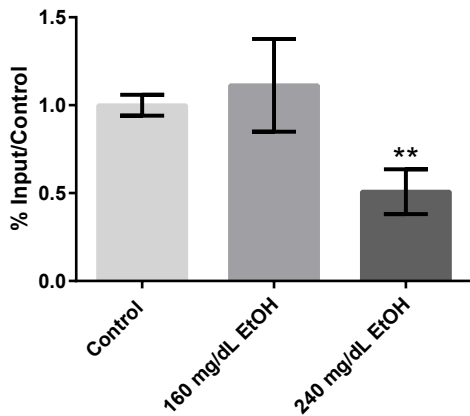**D7 Msx1 H3K27**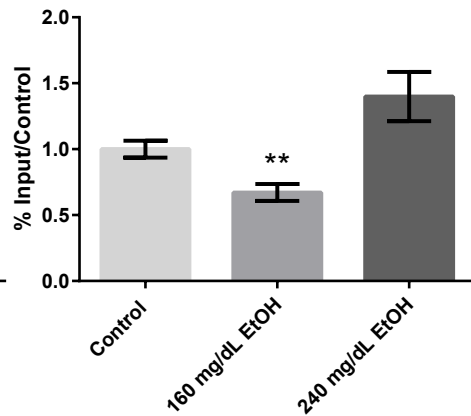**D3 Msx2 H3K27**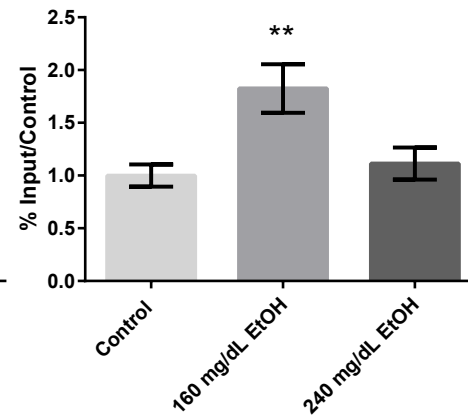**D7 Msx2 H3K27**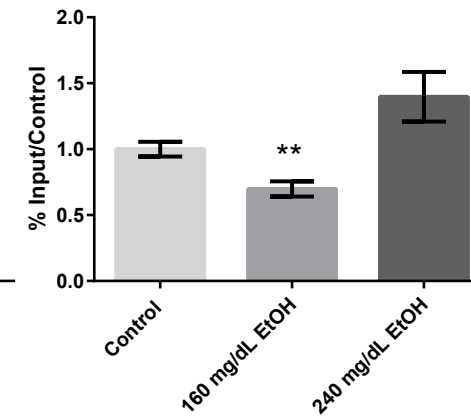

**D3 Twist1 H3K4**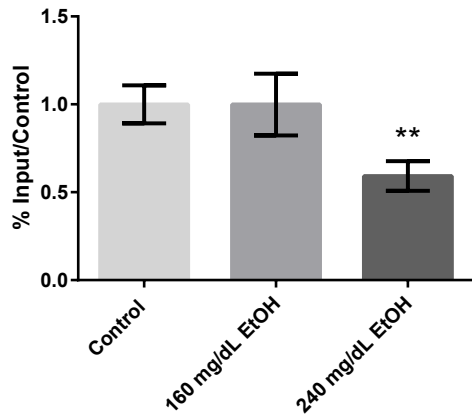**D7 Twist1 H3K4**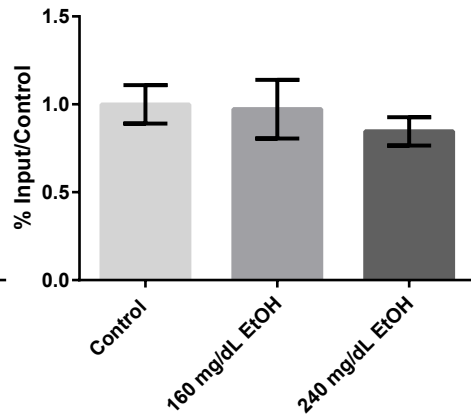**D3 Wnt5b H3K4**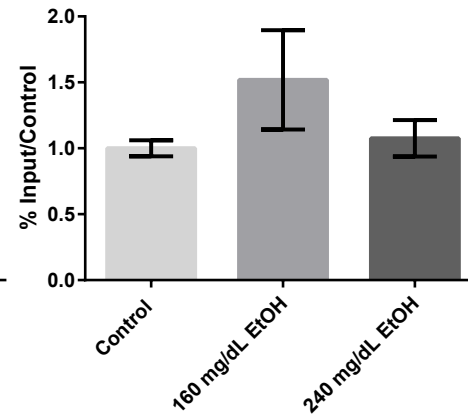**D7 Wnt5b H3K4**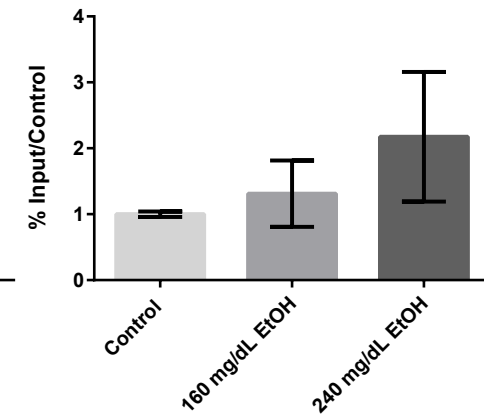**D3 Twist1 H3K27**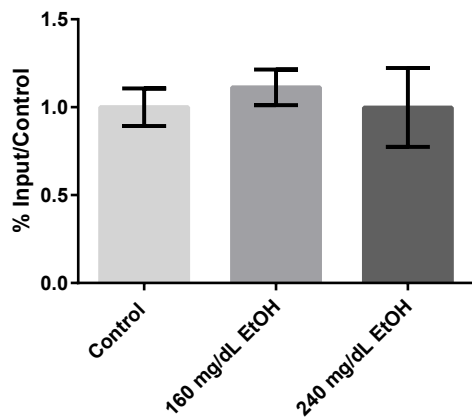**D7 Twist1 H3K27**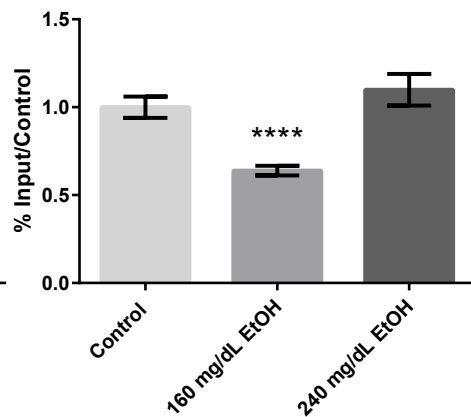**D3 Wnt5b H3K27**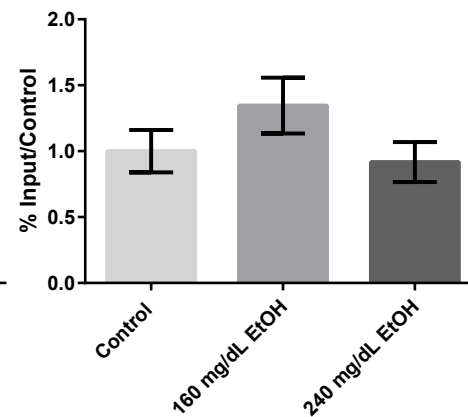**D7 Wnt5b H3K27**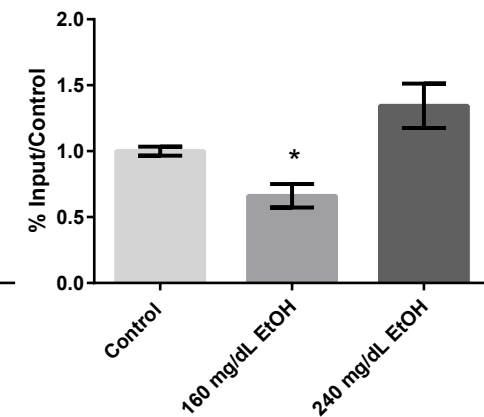

**D3 HoxA1 H3K4**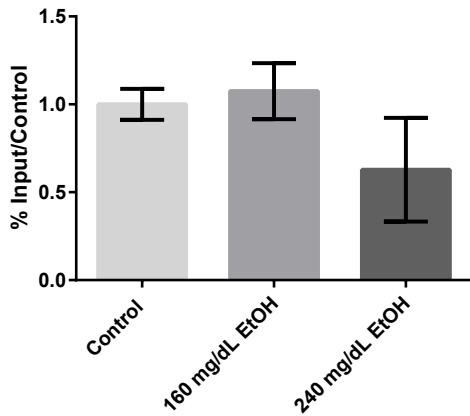**D7 HoxA1 H3K4**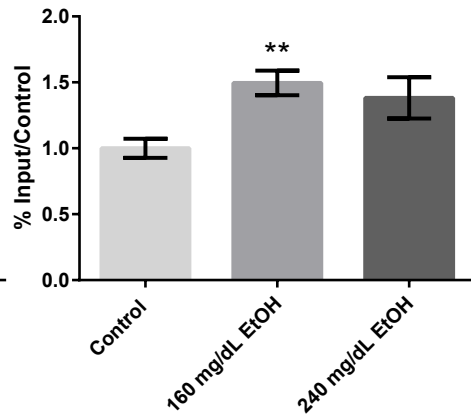**D3 HoxA7 H3K4**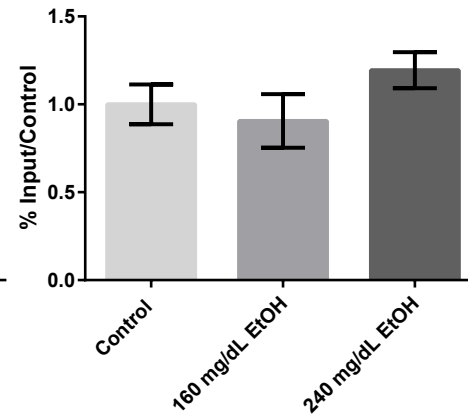**D7 HoxA7 H3K4**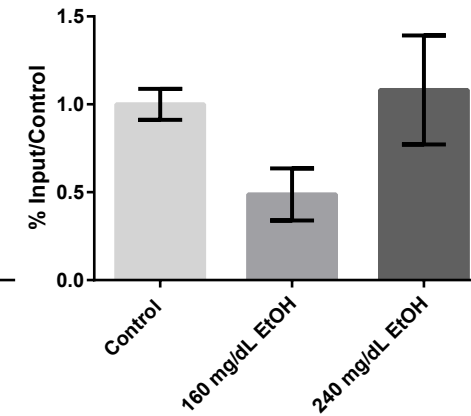**D3 HoxA1 H3K27**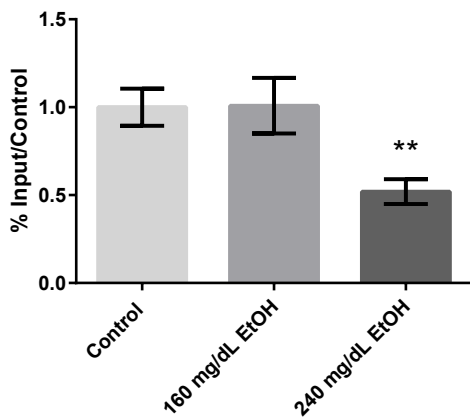**D7 HoxA1 H3K27**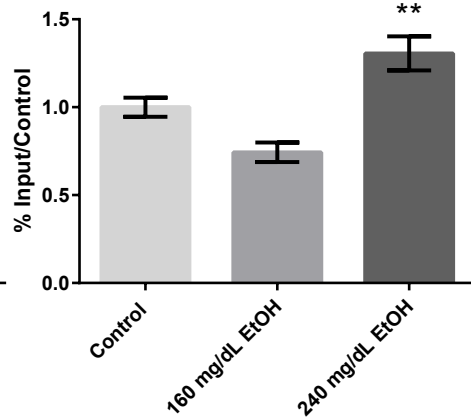**D3 HoxA7 H3K27**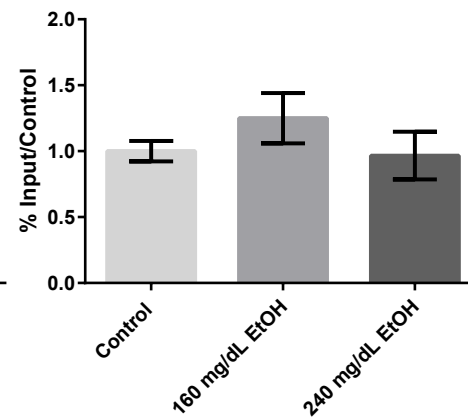**D7 HoxA7 H3K27**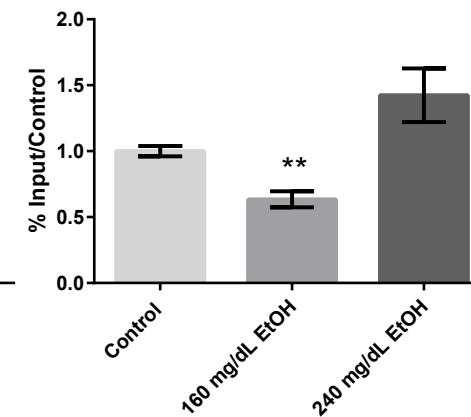

**D3 Oct4 H3K4**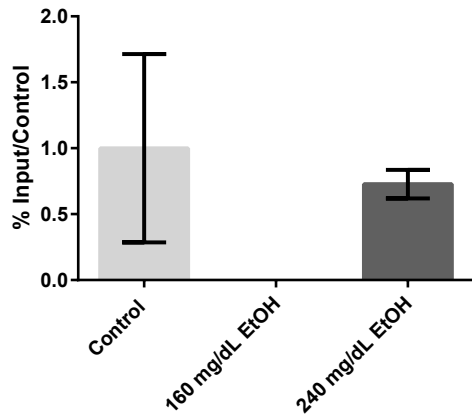**D7 Oct4 H3K4**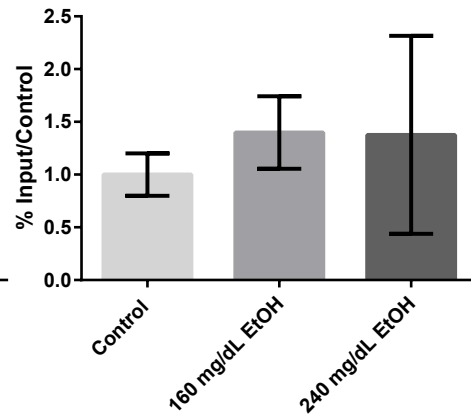**D7 HoxA6 H3K4**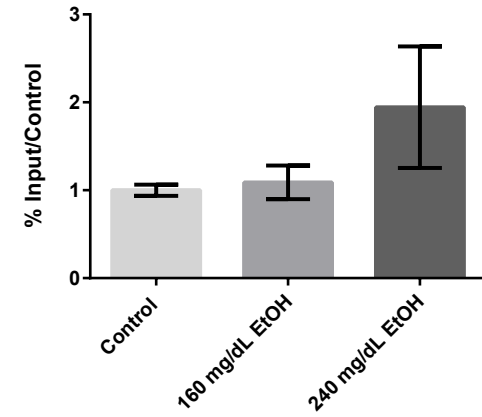**D3 Oct4 H3K27**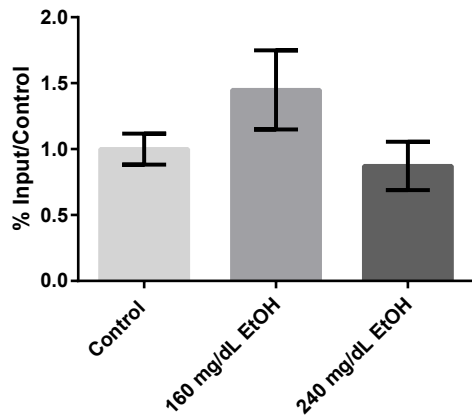**D7 Oct4 H3K27**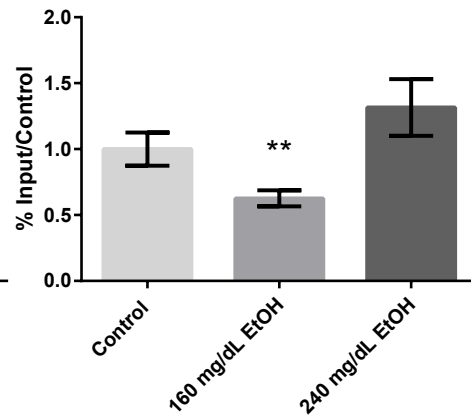**D3 HoxA6 H3K27**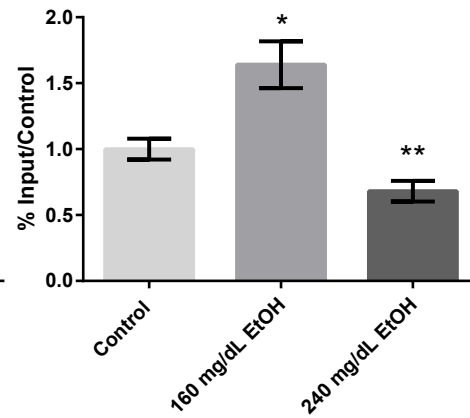**D7 HoxA6 H3K27**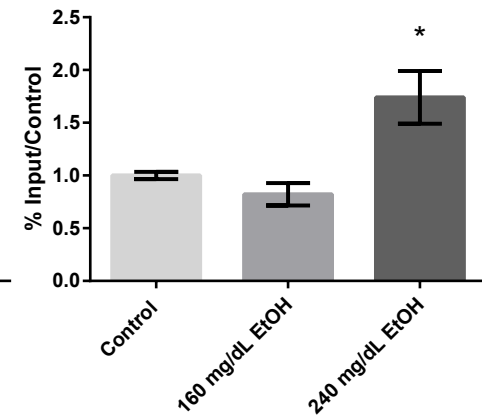



**D3 Dlx1 H3K4**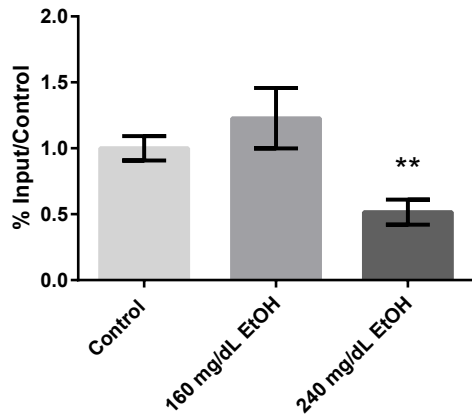**D7 Dlx1 H3K4**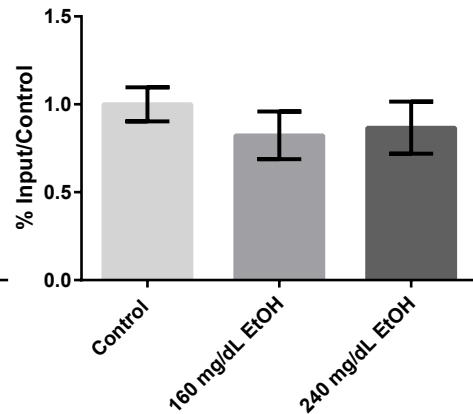**D3 Sox1 H3K4**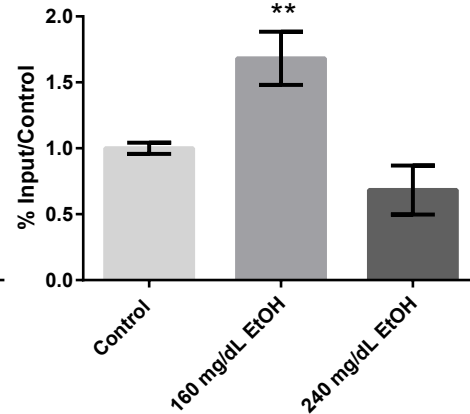**D7 Sox1 H3K4**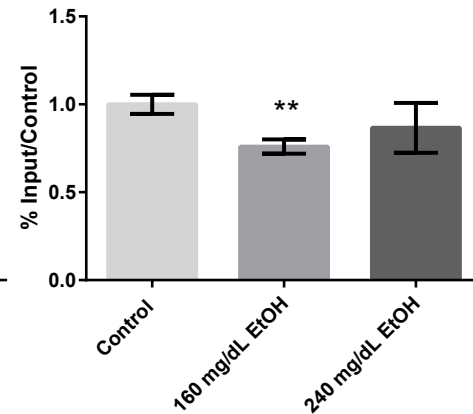**D3 Dlx1 H3K27**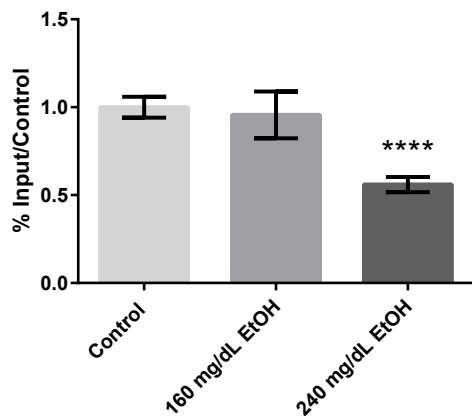**D7 Dlx1 H3K27**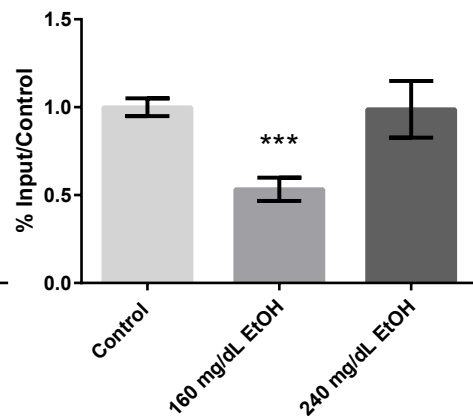**D3 Sox1 H3K27**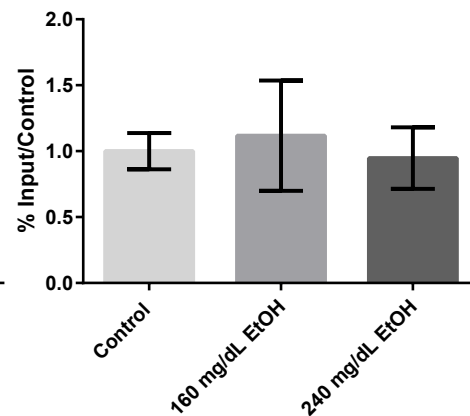**D7 Sox1 H3K27**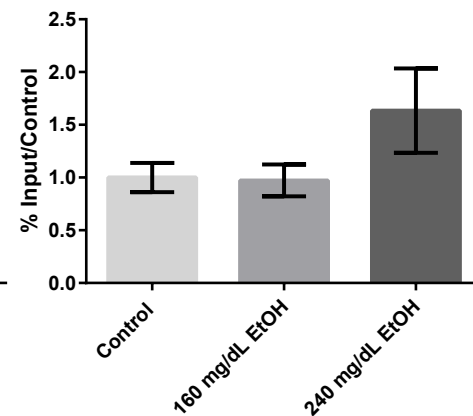

**D3 Tbx2 H3K4**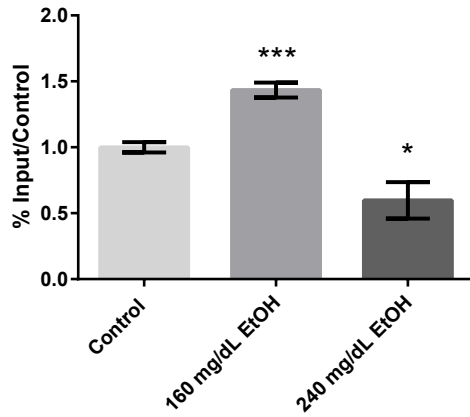**D7 Tbx2 H3K4**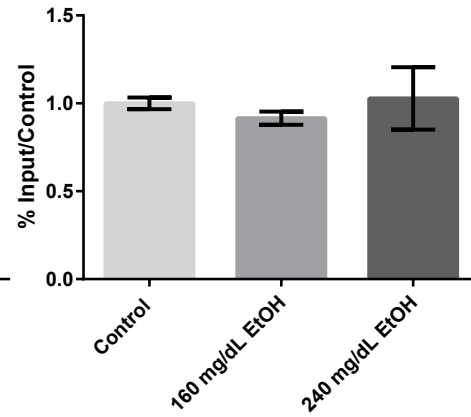**D3 Vdr H3K4**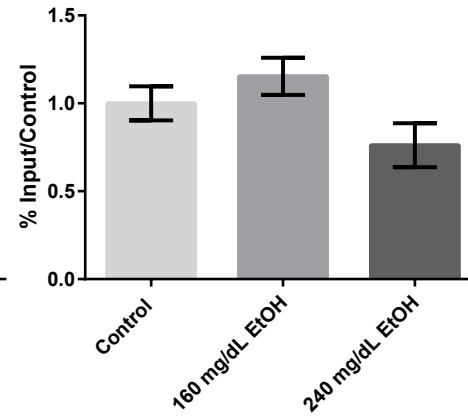**D7 Vdr H3K4**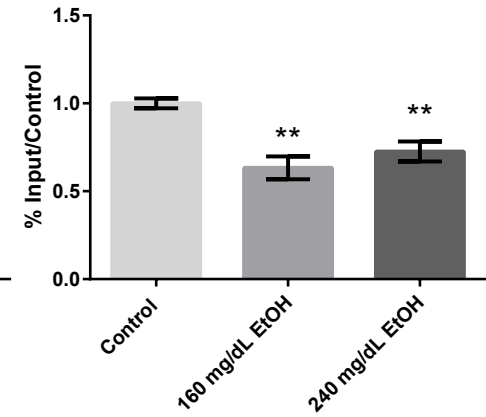**D3 Tbx2 H3K27**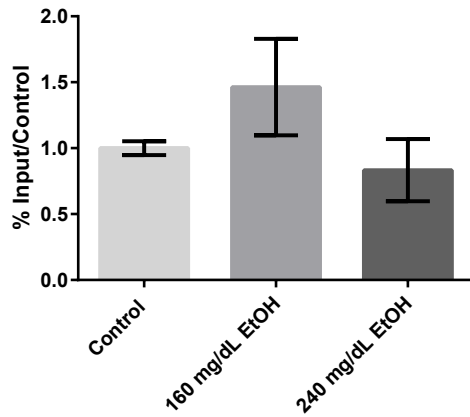**D7 Tbx2 H3K27**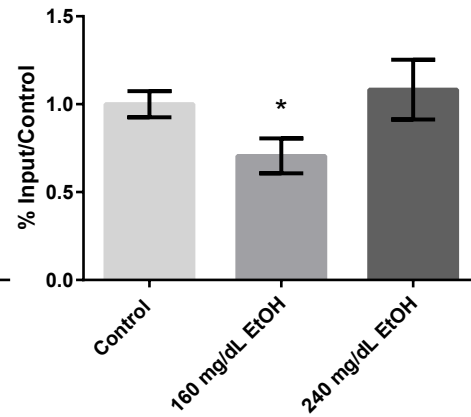**D3 Vdr H3K27**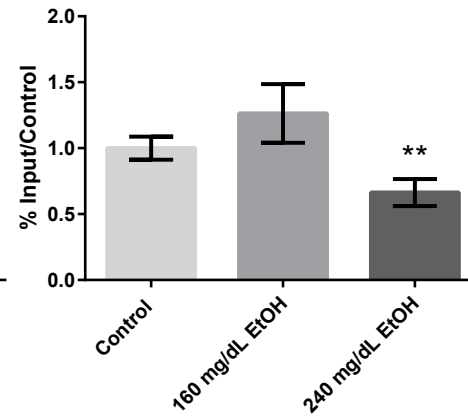**D7 Vdr H3K27**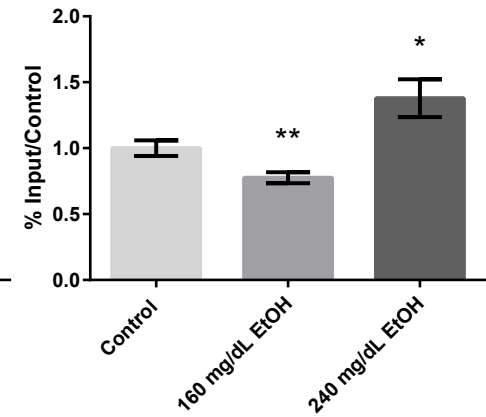

**D3 Nkx2.1 H3K4**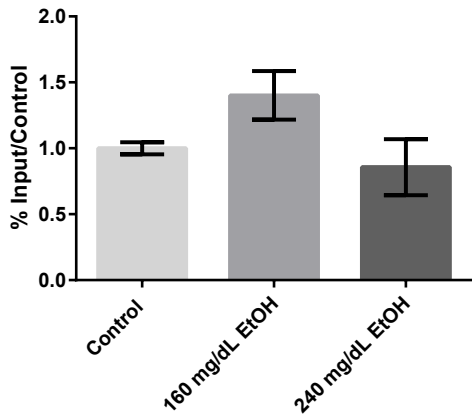**D7 Nkx2.1 H3K4**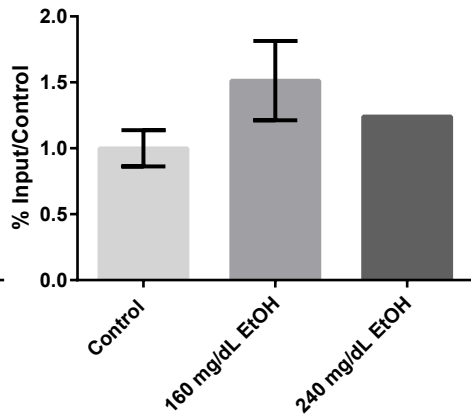**D3 Nkx2.2 H3K4**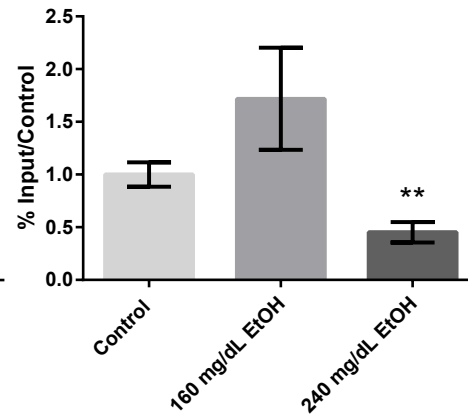**D7 Nkx2.2 H3K4**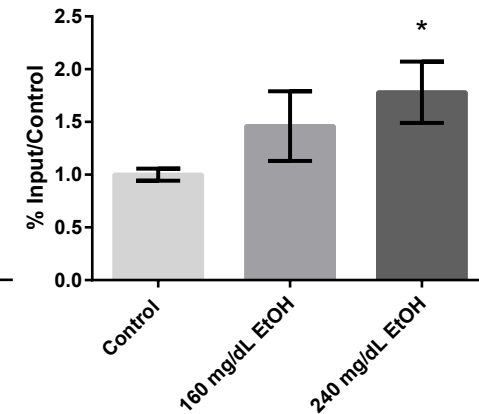**D3 Nkx2.1 H3K27**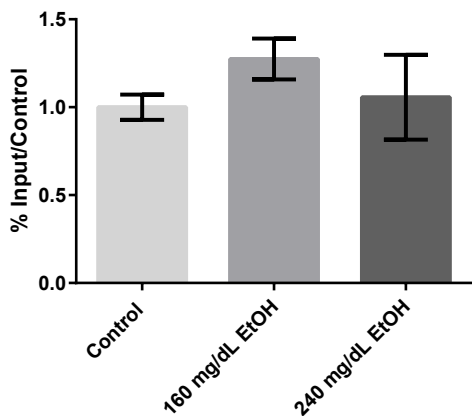**D7 Nkx2.1 H3K27**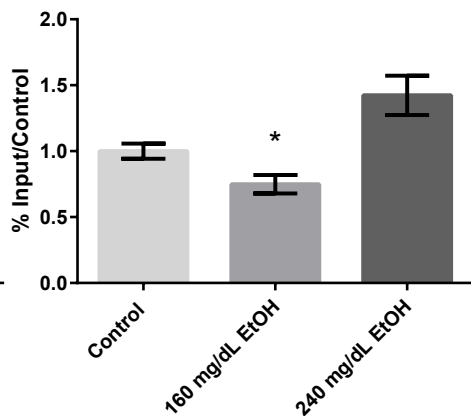**D3 Nkx2.2 H3K27**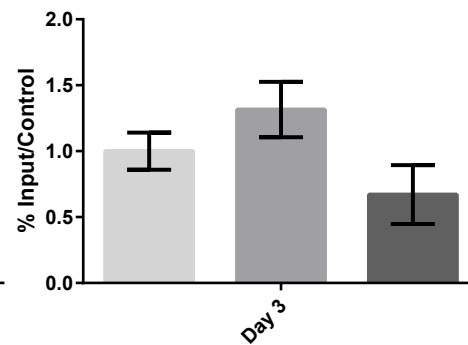**D7 Nkx2.2 H3K27**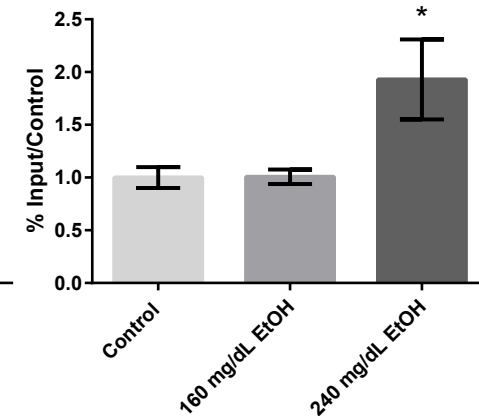

**D3 Dix2 H3K4**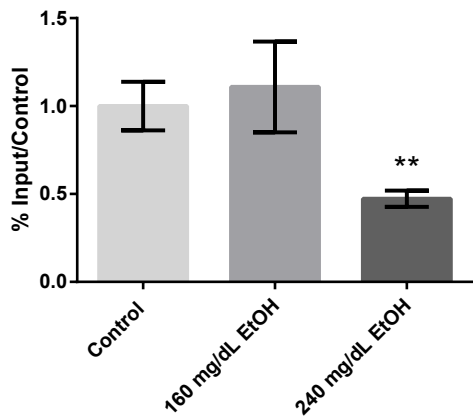**D7 Dix2 H3K4**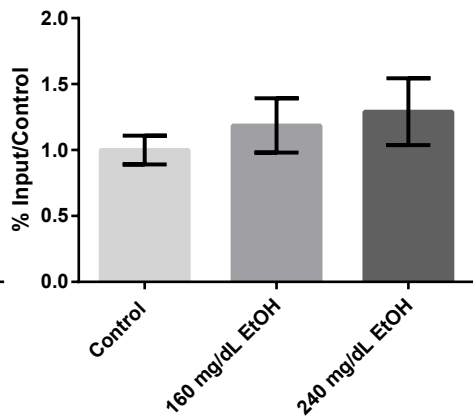**D3 Sox2 H3K4**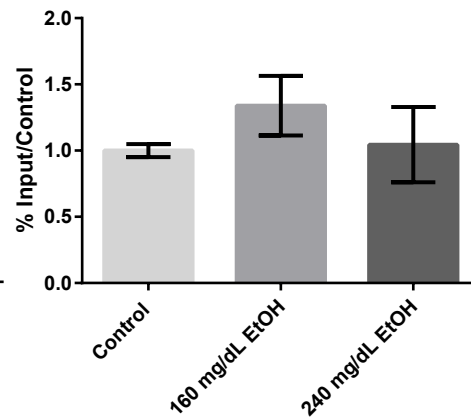**D7 Sox2 H3K4**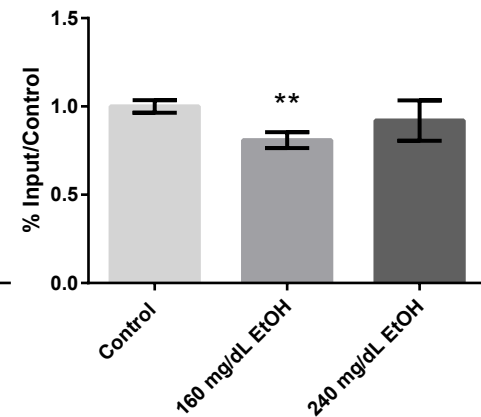**D3 Dix2 H3K27**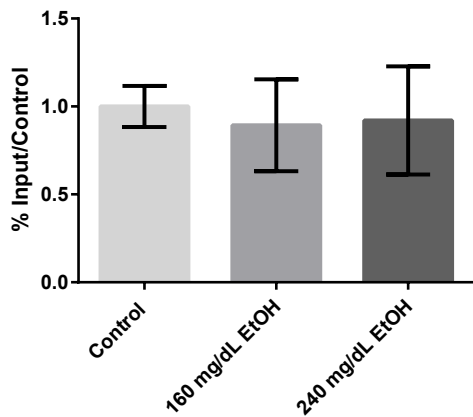**D7 Dix2 H3K27**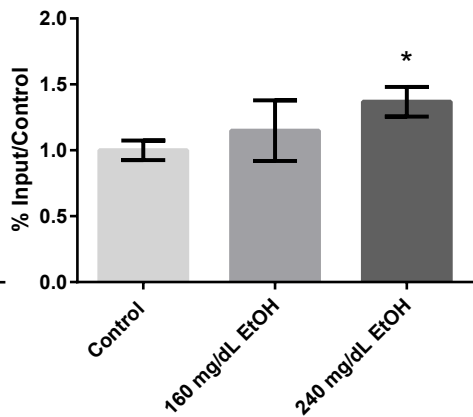**D3 Sox2 H3K27**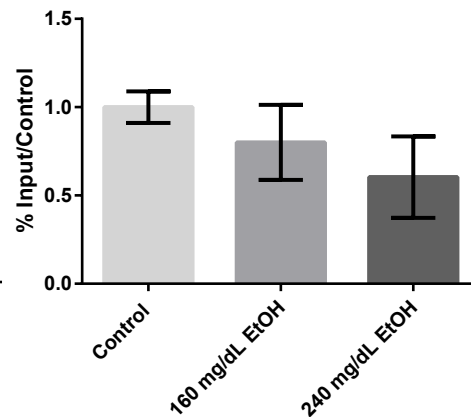**D7 Sox2 H3K27**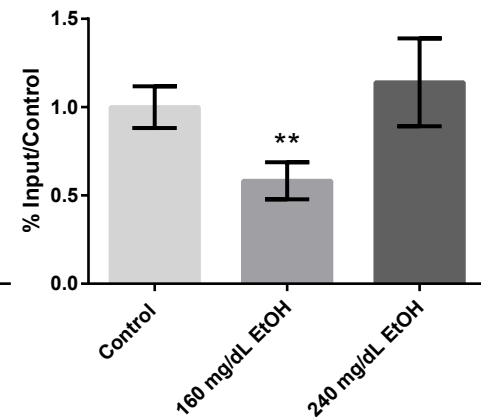

**D3 Dlx2 H3K9ac**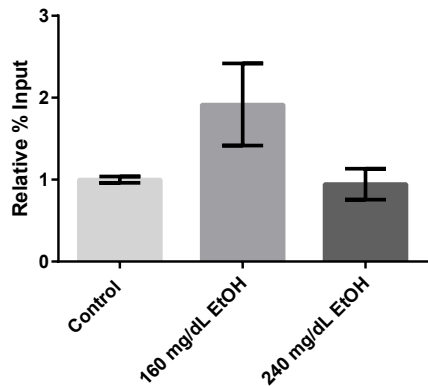**D7 Dlx2 H3K9ac**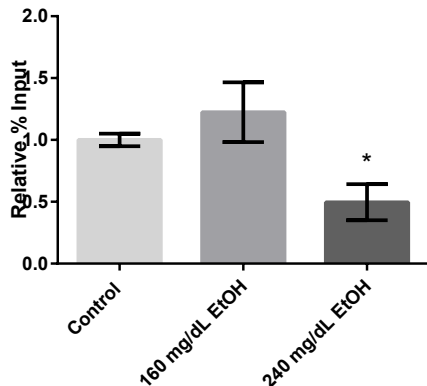**D3 Sox2 H3K9ac**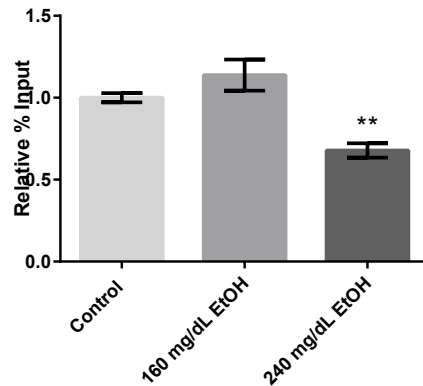**D7 Sox2 H3K9ac**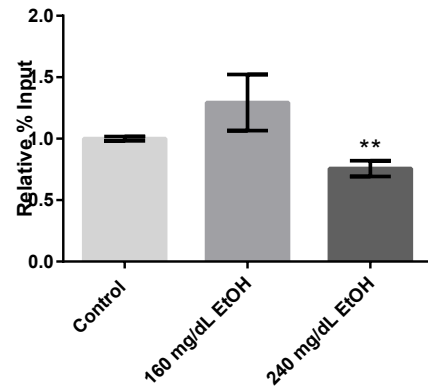**D3 Dlx2 H3K9di**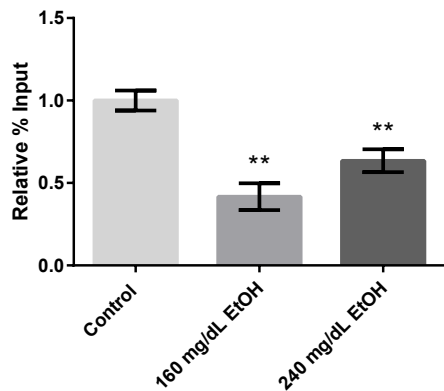**D7 Dlx2 H3K9di**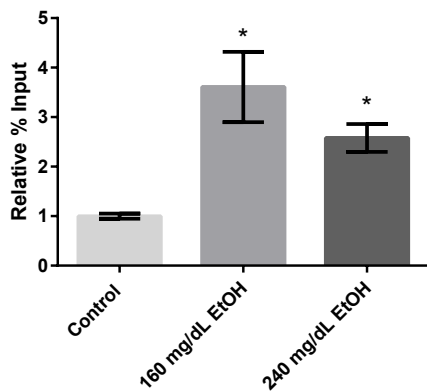**D3 Sox2 H3K9di**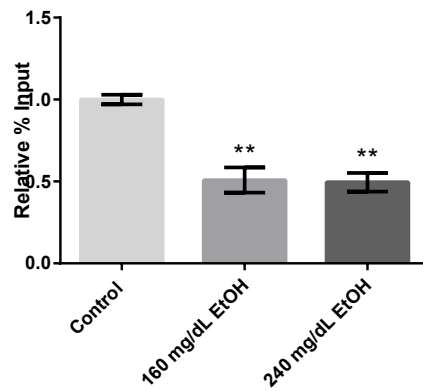**D7 Sox2 H3K9di**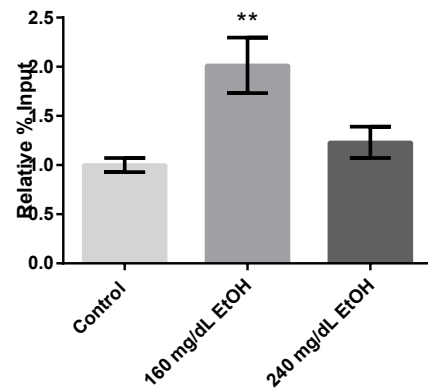

**D3 Nanog H3K9ac**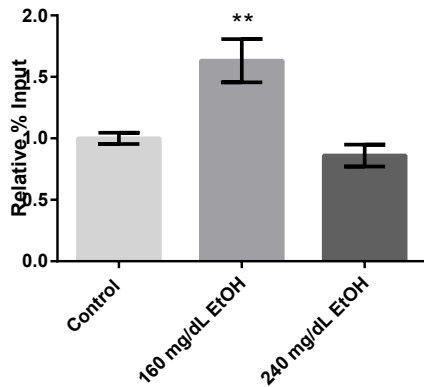**D7 Nanog H3K9ac**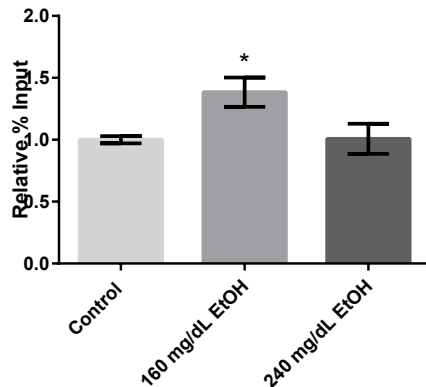**D3 Smarca2 H3K9ac**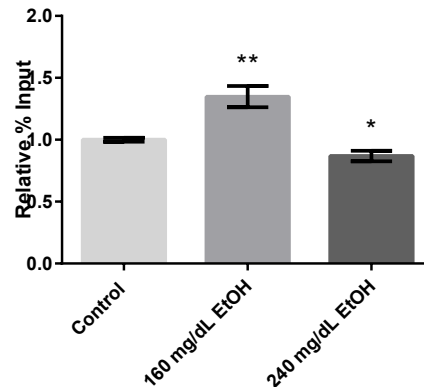**D7 Smarca2 H3K9ac**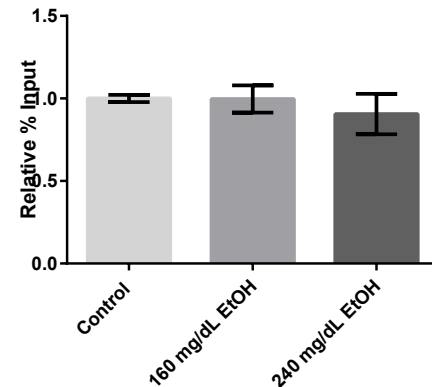**D3 Nanog H3K9di**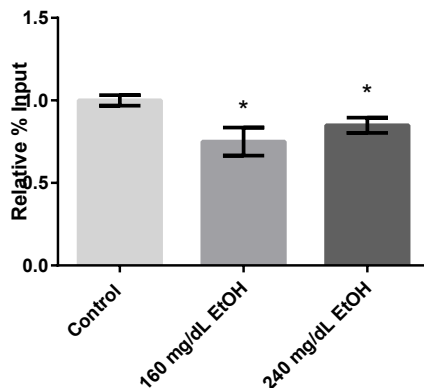**D7 Nanog H3K9di**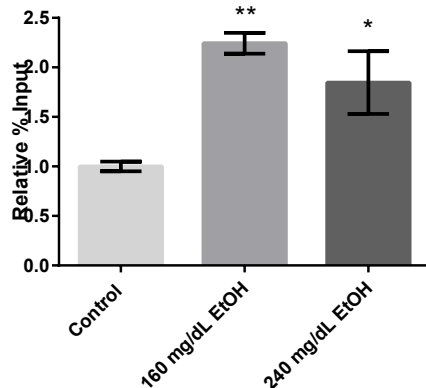**D3 Smarca2 H3K9di**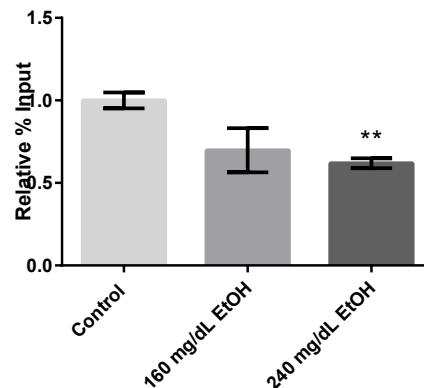**D7 Smarca2 H3K9di**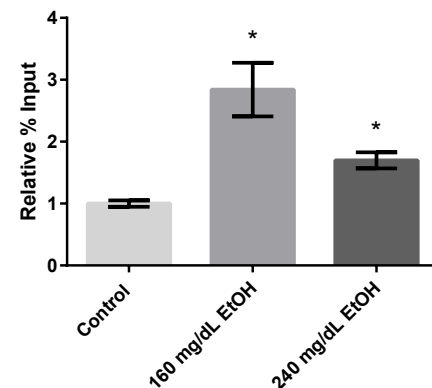

**D3 Ascl1 H3K9ac**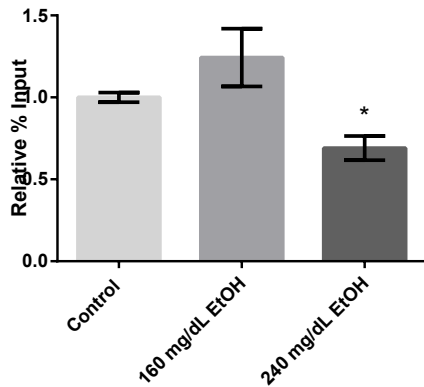**D7 Ascl1 H3K9ac**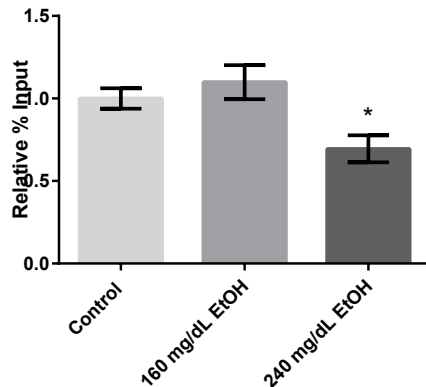**D3 Dlx3 H3K9ac**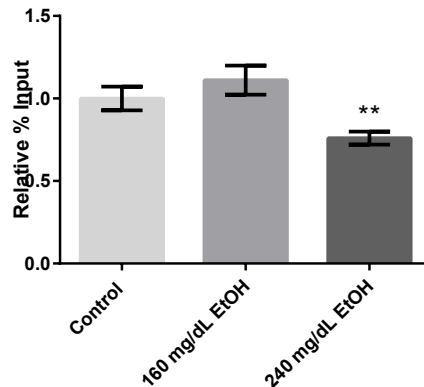**D7 Dlx3 H3K9ac**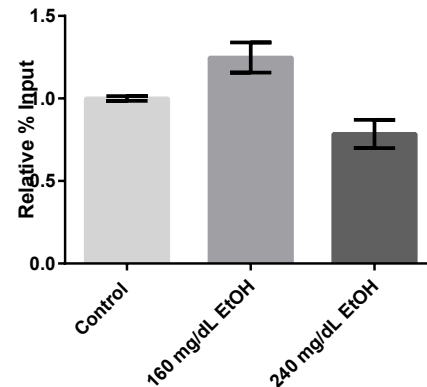**D3 Ascl1 H3K9di**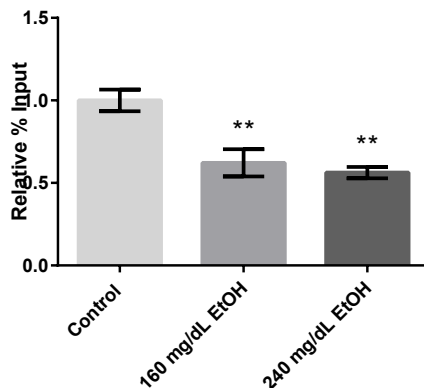**D7 Ascl1 H3K9di**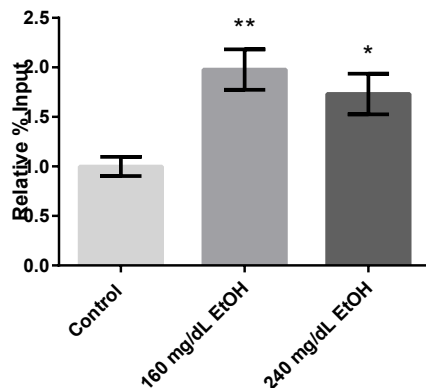**D3 Dlx3 H3K9di**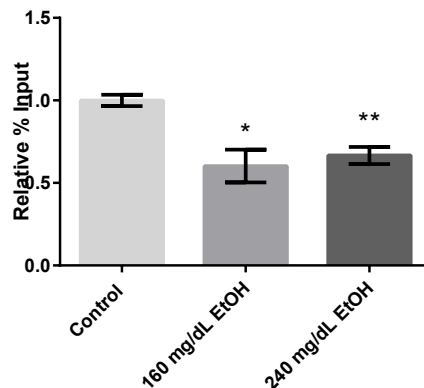**D7 Dlx3 H3K9di**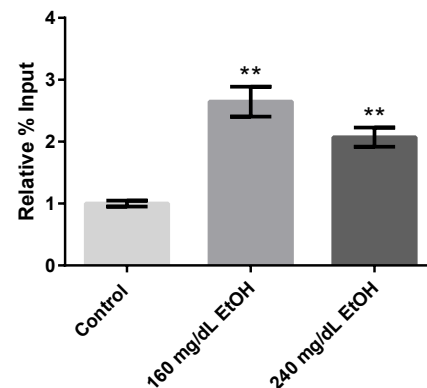

**D3 Dlx5 H3K9ac**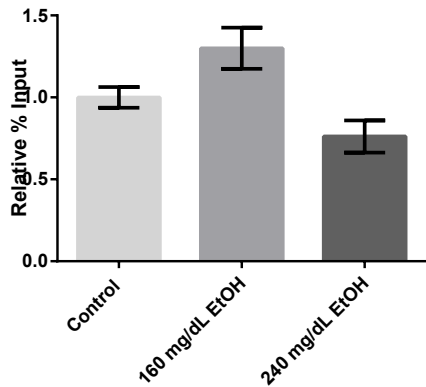**D7 Dlx5 H3K9ac**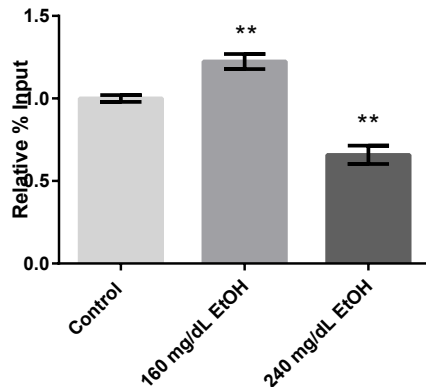**D3 Msx1 H3K9ac**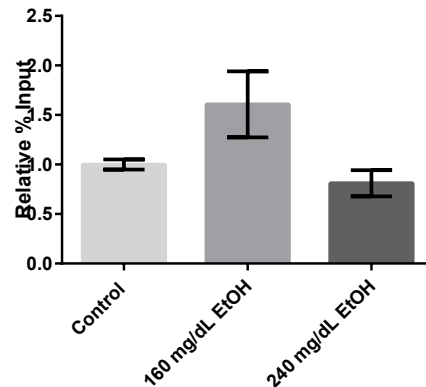**D7 Msx1 H3K9ac**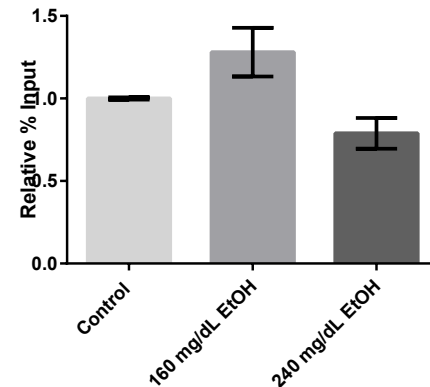**D3 Dlx5 H3K9di**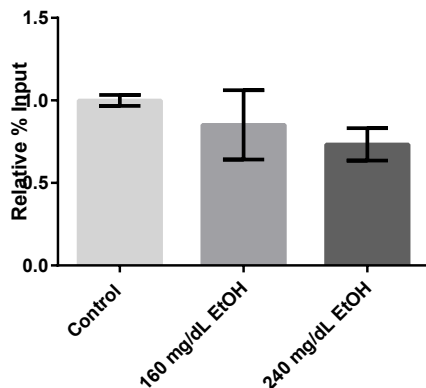**D7 Dlx5 H3K9di**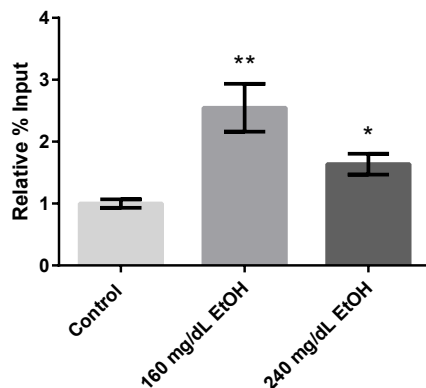**D3 Msx1 H3K9di**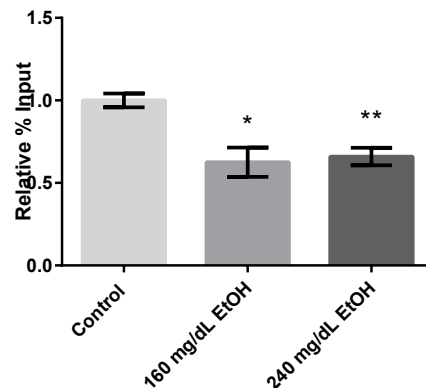**D7 Msx1 H3K9di**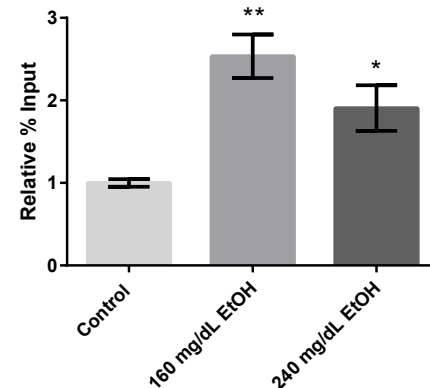



**D3 Nkx2.2 H3K9ac**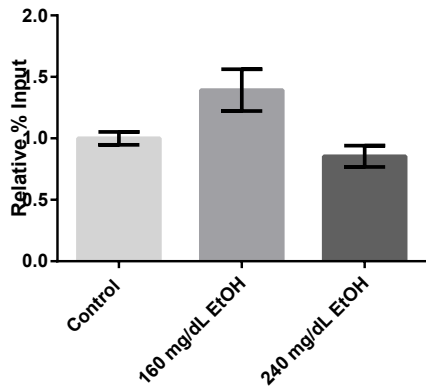**D7 Nkx2.2 H3K9ac**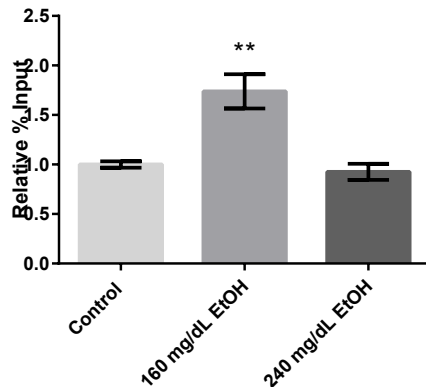**D3 Sox17 H3K9ac**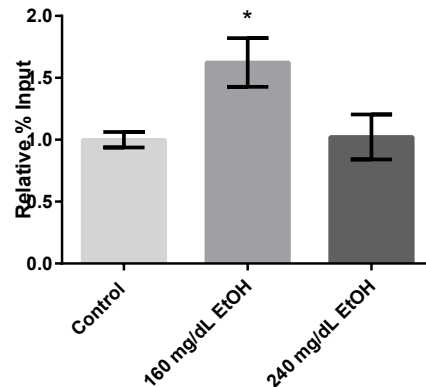**D7 Sox17 H3K9ac**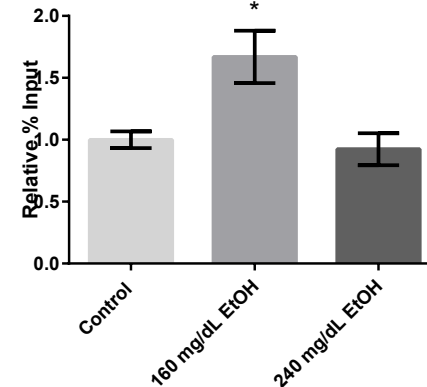**D3 Nkx2.2 H3K9di**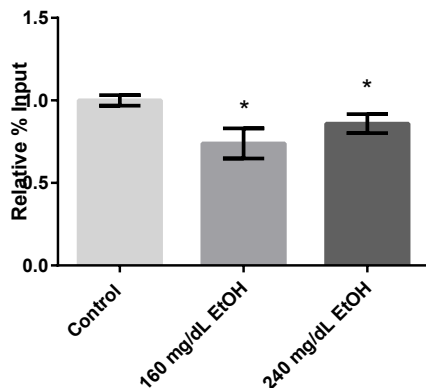**D7 Nkx2.2 H3K9di**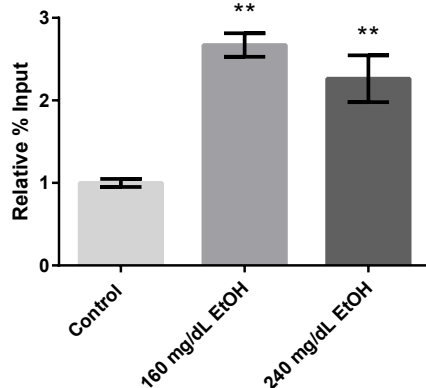**D3 Sox17 H3K9di**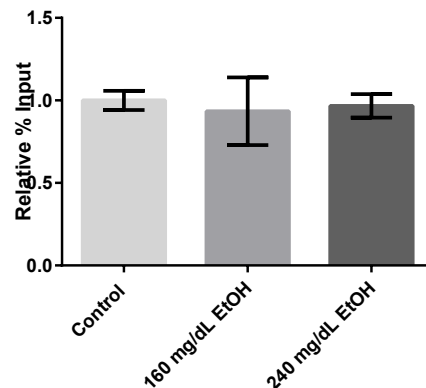**D7 Sox17 H3K9di**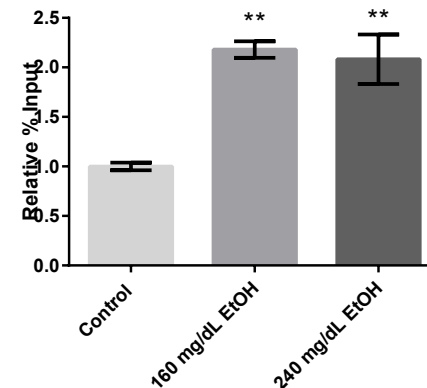

**D3 HoxA1 H3K9ac**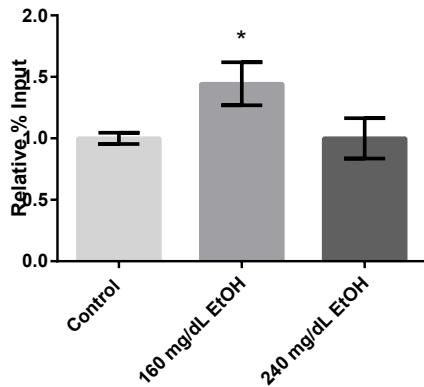**D7 HoxA1 H3K9ac**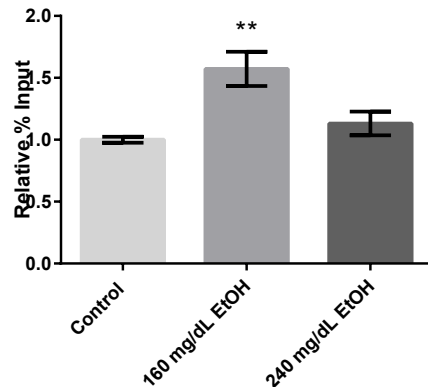**D3 HoxA7 H3K9ac**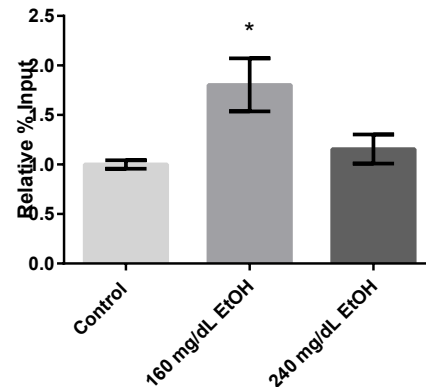**D7 HoxA7 H3K9ac**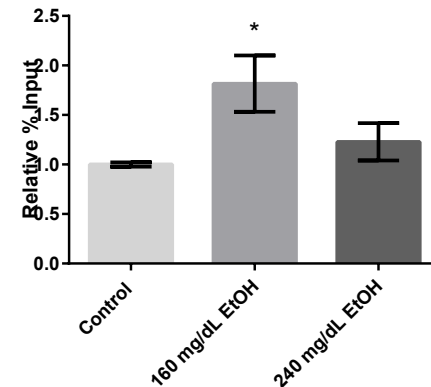**D3 HoxA1 H3K9di**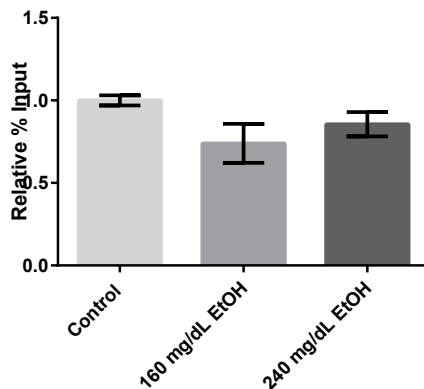**D7 HoxA1 H3K9di**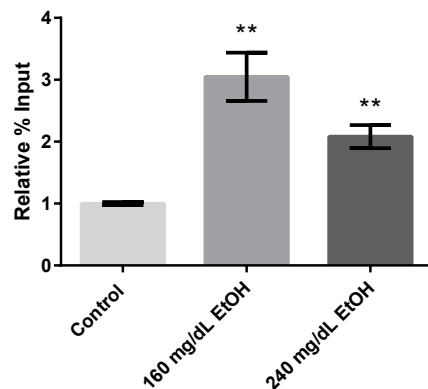**D3 HoxA7 H3K9di**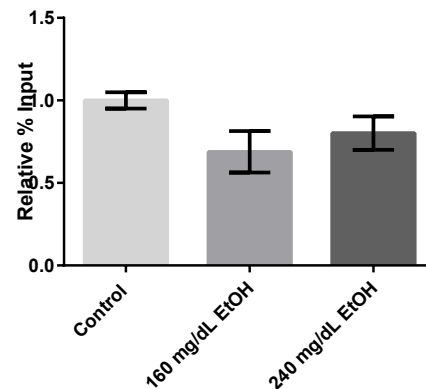**D7 HoxA7 H3K9di**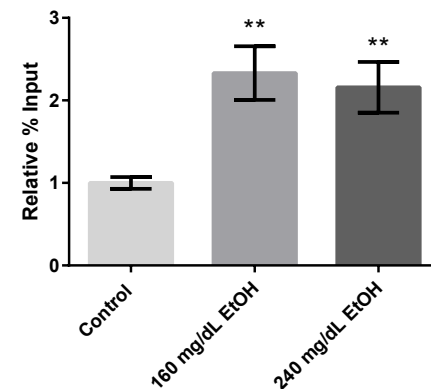

**D3 Msx2 H3K9ac**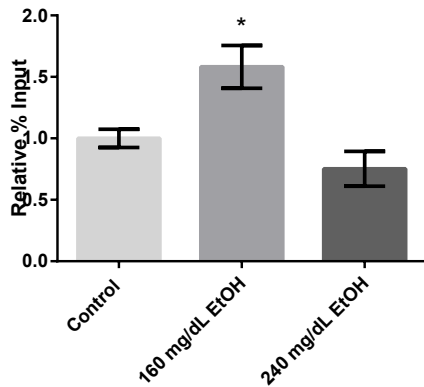**D7 Msx2 H3K9ac**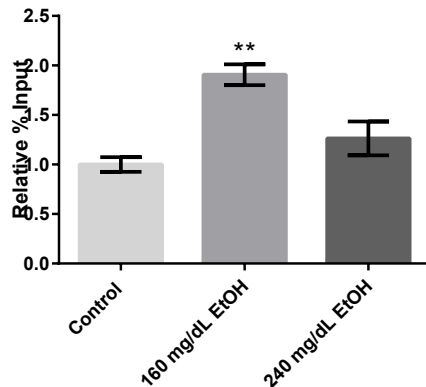**D3 Oct4 H3K9ac**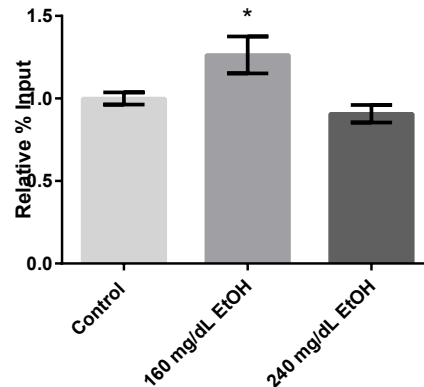**D7 Oct4 H3K9ac**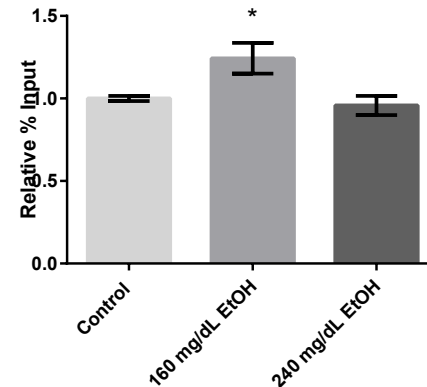**D3 Msx2 H3K9di**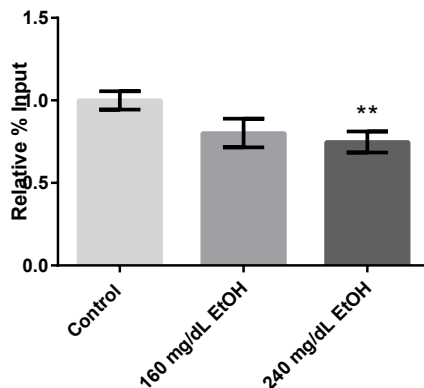**D7 Msx2 H3K9di**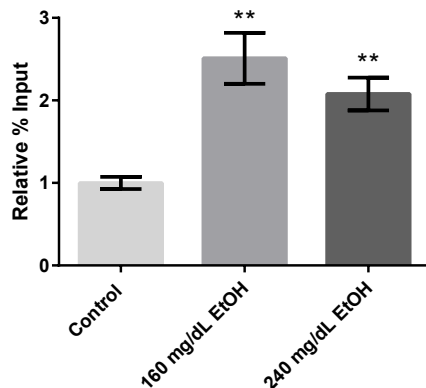**D3 Oct4 H3K9di**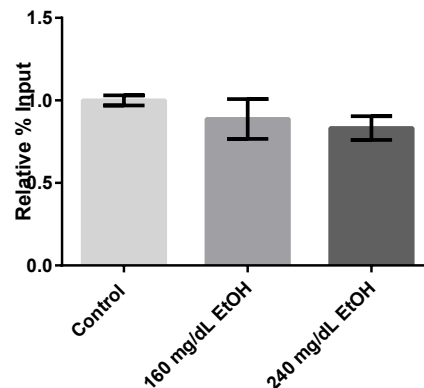**D7 Oct4 H3K9di**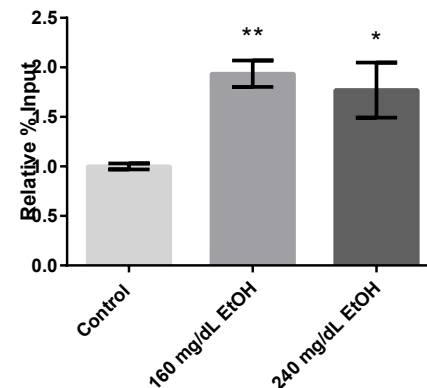

**D3 Twist1 H3K9ac**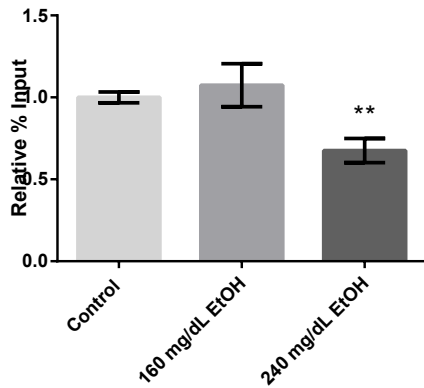**D7 Twist1 H3K9ac**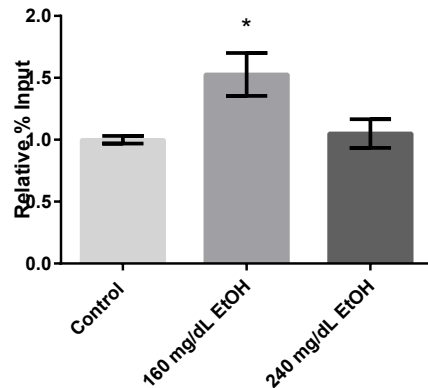**D3 Wnt5b H3K9ac**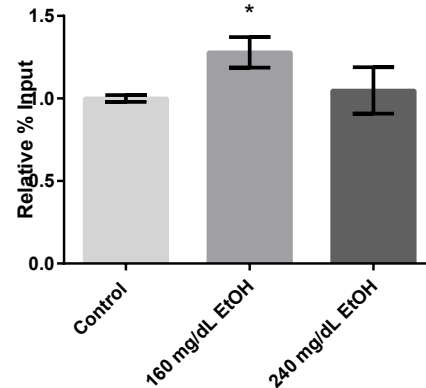**D7 Wnt5b H3K9ac**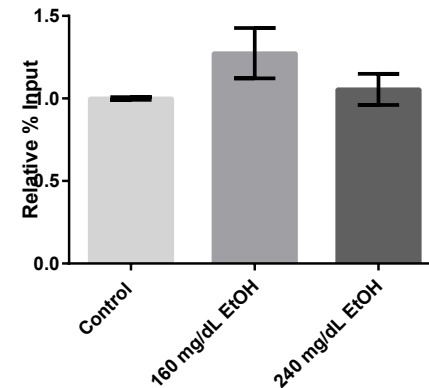**D3 Twist1 H3K9di**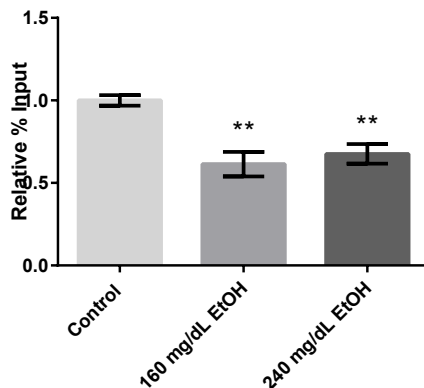**D7 Twist1 H3K9di**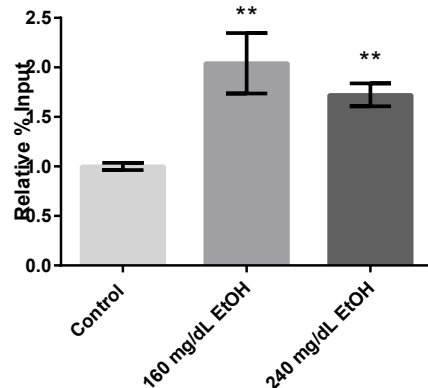**D3 Wnt5b H3K9di**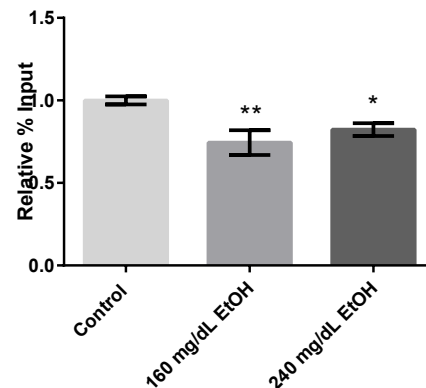**D7 Wnt5b H3K9di**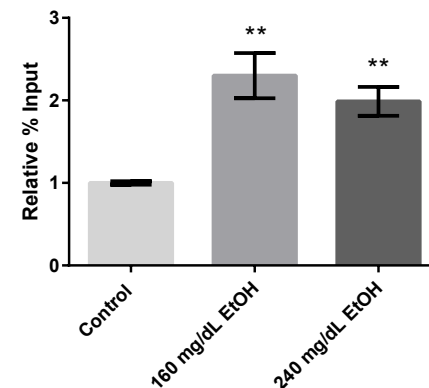

**D3 Dlx1 H3K9ac**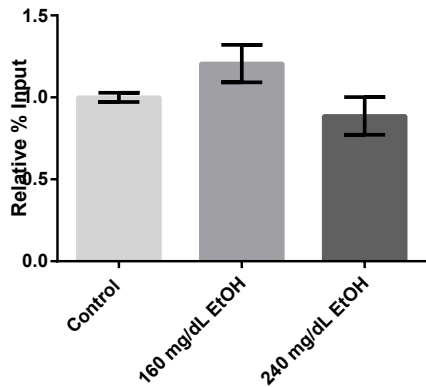**D7 Dlx1 H3K9ac**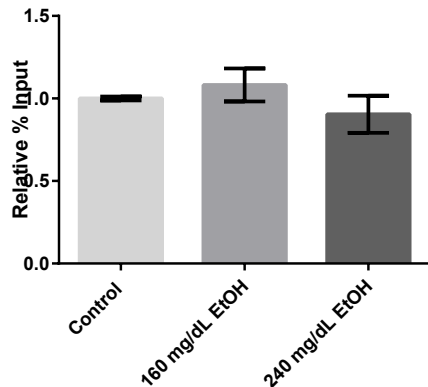**D3 HoxA6 H3K9ac**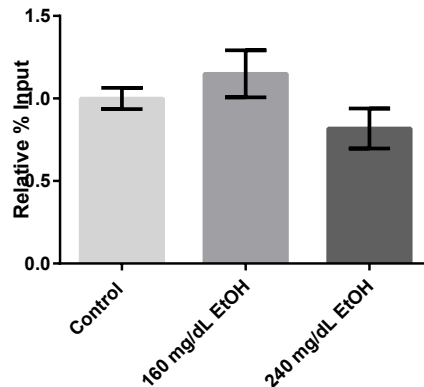**D7 HoxA6 H3K9ac**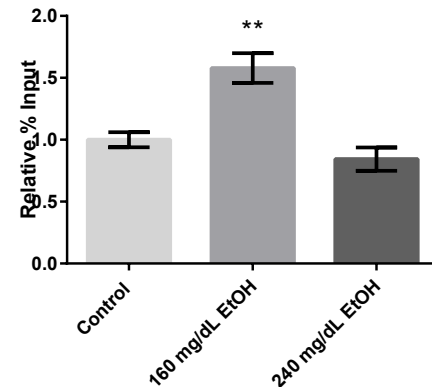**D3 Dlx1 H3K9di**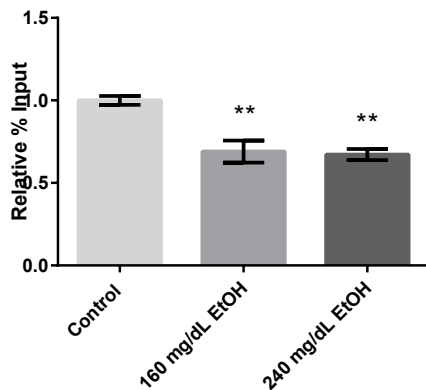**D7 Dlx1 H3K9di**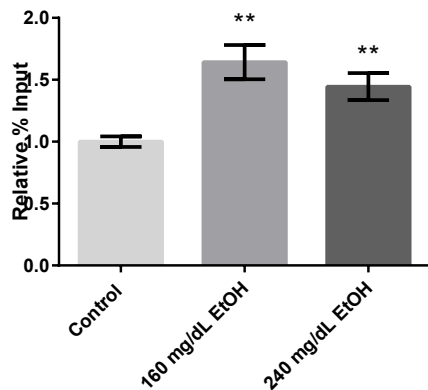**D3 HoxA6 H3K9di**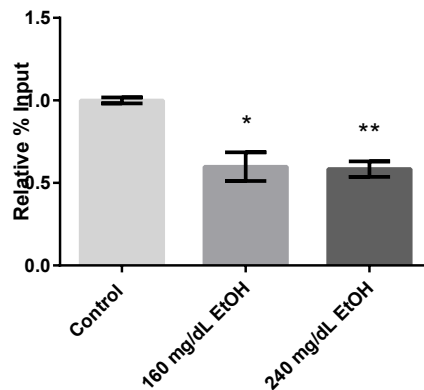**D7 HoxA6 H3K9di**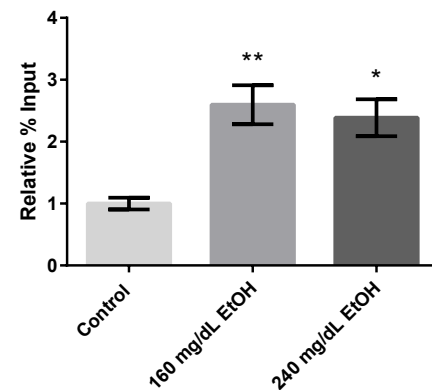

**D3 Sox1 H3K9ac**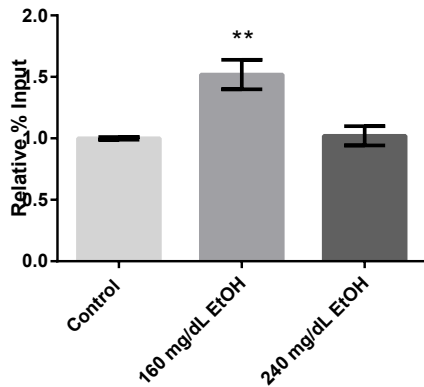**D7 Sox1 H3K9ac**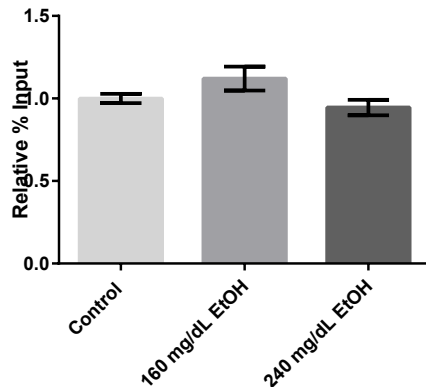**D3 Tbx2 H3K9ac**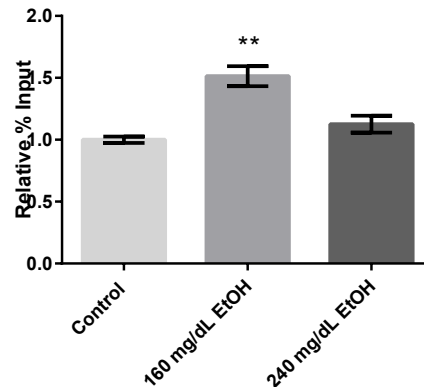**D7 Tbx2 H3K9ac**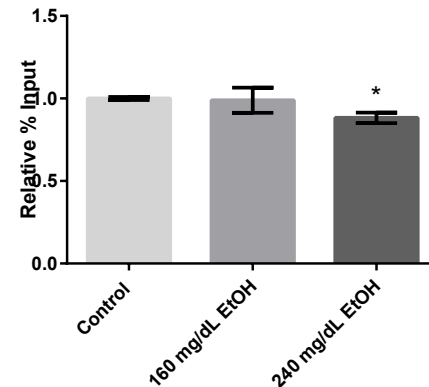**D3 Sox1 H3K9di**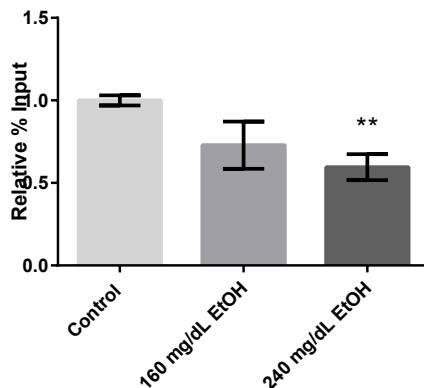**D7 Sox1 H3K9di**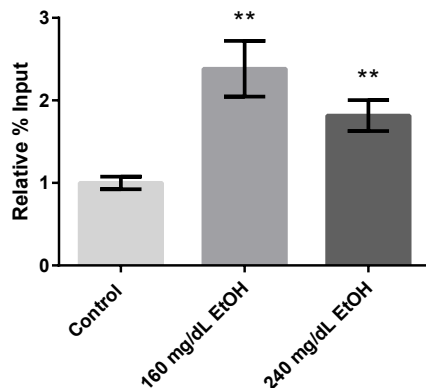**D3 Tbx2 H3K9di**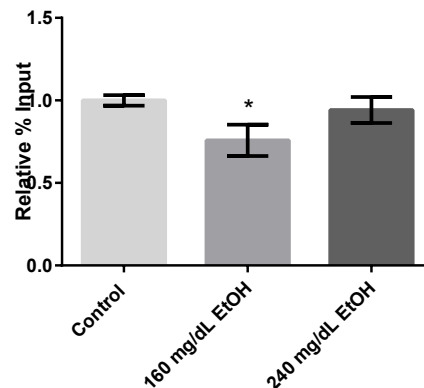**D7 Tbx2 H3K9di**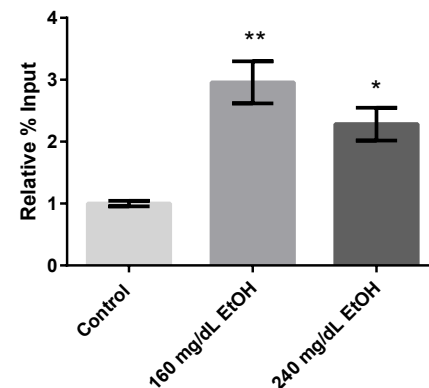

**D3 Vdr H3K9ac**

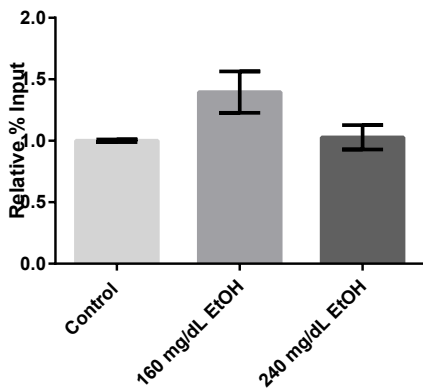

**D7 Vdr H3K9ac**

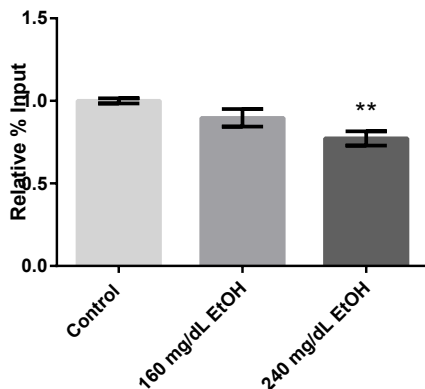

**D3 Pax6 H3K9ac**

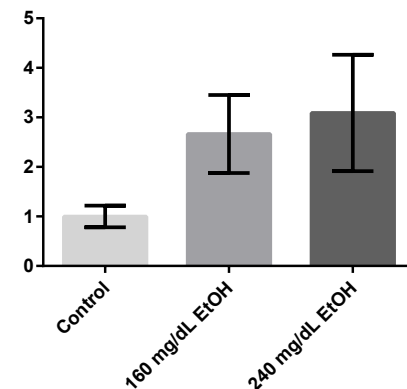

**D7 Pax6 H3K9ac**

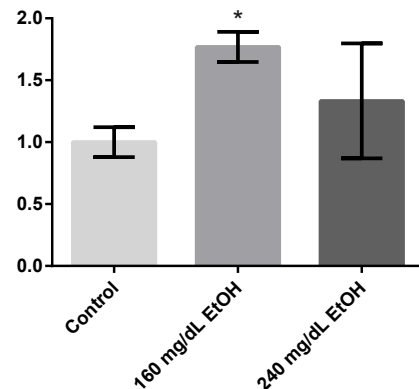

**D3 Vdr H3K9di**

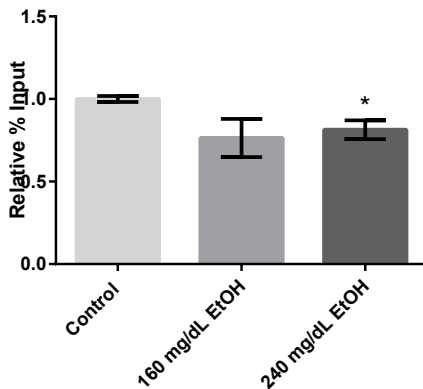

**D7 Vdr H3K9di**

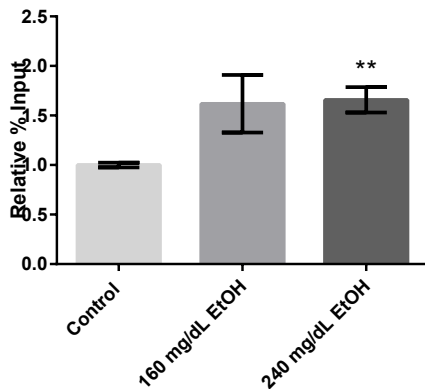

**D3 Pax6 H3K9di**

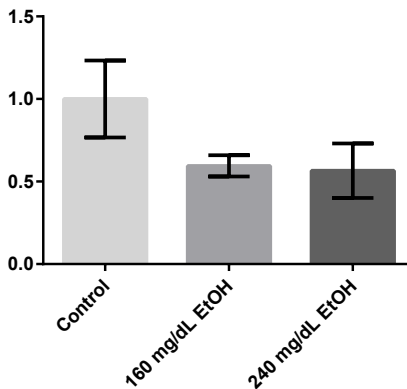

**D7 Pax6 H3K9di**

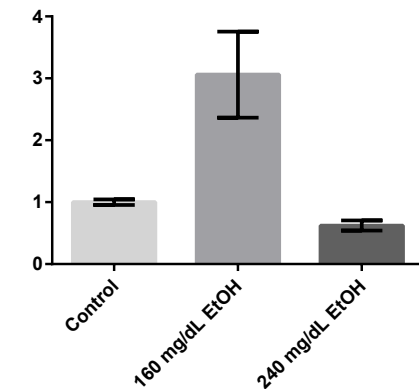

Supplement: 13072_2015_31_MOESM1_ESM.pdf [file 13072_2015_31_MOESM1_ESM.pdf]
